# Supplementary material for: Exonuclease-assisted target recycling for ultrasensitive electrochemical detection of microRNA at vertically aligned carbon nanotubes
Source: Royal Society of Chemistry journal article supplement (doi:10.1039/c9nr02543j), 2019-01-01
Supplement: c9nr02543j1.pdf [file c9nr02543j1.pdf]

## Electronic Supplementary Information (ESI)

### **Exonuclease-assisted target recycling for ultrasensitive electrochemical detection of microRNA at vertically aligned carbon nanotubes**

Zhichao Chen,<sup>a</sup> Yiming Xie,<sup>a</sup> Wan Huang,<sup>a</sup> Chuanying Qin,<sup>a</sup> Aimin Yu,<sup>a,b</sup> Guosong Lai\*<sup>a</sup>

<sup>a</sup> *Hubei Key Laboratory of Pollutant Analysis & Reuse Technology, Department of Chemistry, Hubei Normal University, Huangshi 435002, PR China*

<sup>b</sup> *Department of Chemistry and Biotechnology, Faculty of Science, Engineering and Technology, Swinburne University of Technology, Hawthorn VIC 3122, Australia*

\* Corresponding author

E-mail: [gslai@hbnu.edu.cn](mailto:gslai@hbnu.edu.cn) (G. Lai)

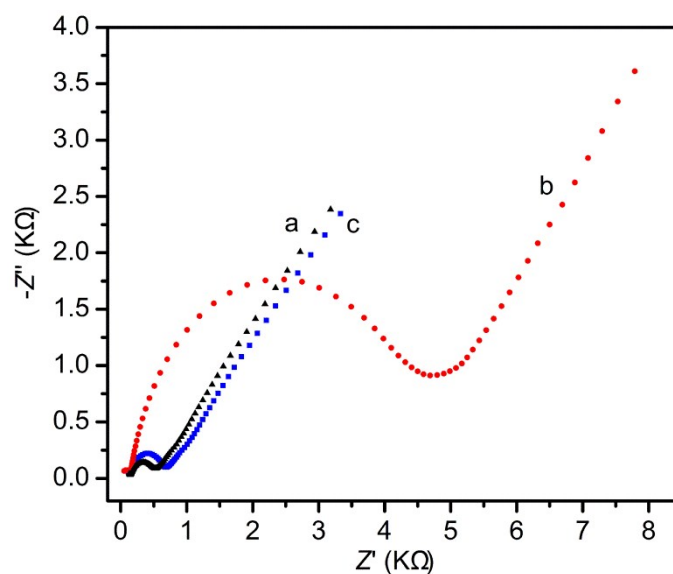

**Fig. S1** EIS spectra of the bare (a), aryldiazonium salt (b) and vertically aligned SWCNTs modified (c) gold electrode recorded in 5.0 mM  $K_3Fe(CN)_6/K_4Fe(CN)_3$  (1:1) containing 0.10 M KCl.

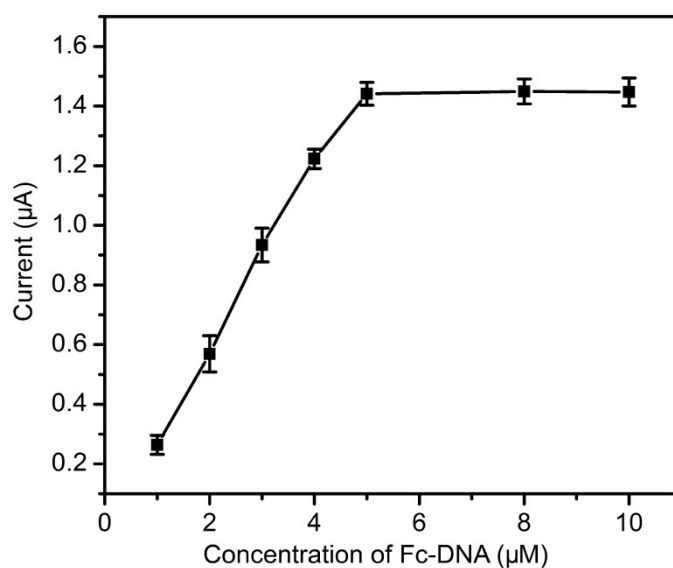

**Fig. S2** DPV responses of the electrochemical biosensor in 50 mM pH 7.4 Tris-HCl containing 0.1 M  $NaClO_4$  which is prepared from noncovalent adsorption of 3  $\mu\text{L}$  Fc-DNA with different concentrations at the vertically aligned SWCNT-modified electrode.

**Table S1** An overview on the detection strategy and analytical performance of the biosensing methods recently reported for miRNA analysis.

| miRNA analyte       | Detection strategy                                                                                                                 | Linear range      | LOD     | Ref.      |
|---------------------|------------------------------------------------------------------------------------------------------------------------------------|-------------------|---------|-----------|
| miRNA-21            | Enzymatic extension of poly-thymine for in situ formation of fluorescence copper nanoparticles                                     | 1.0 pM–<br>1.0 nM | 0.1 pM  | 10        |
| hsa-miR-103a-<br>3p | Phosphorus nanosheet-based fluorescence resonance energy transfer                                                                  | 10–<br>1000 nM    | 9.37 nM | 11        |
| miRNA-122           | Resonance energy transfer between TiO <sub>2</sub> nanorods/gold nanocomposites for photoelectrochemical biosensing                | 100 fM–<br>3.0 nM | 83 fM   | 15        |
| miRNA-21            | Hybridization reaction-induced electrochemical signal inhibition to thionine and gold nanoparticle-functionalized MoS <sub>2</sub> | 1.0 pM–<br>10 nM  | 0.26 pM | 19        |
| let-7a miRNA        | Catalyzed hairpin assembly coupled with hybridization chain reaction to generate G-quadruplex DNAzyme for colorimetric analysis    | 10 fM–<br>10 nM   | 7.4 fM  | 34        |
| let-7a miRNA        | Bifunctional strand displacement reaction-mediated hyperbranched rolling circle amplification for fluorescence assay               | 0.1 pM–<br>10 nM  | 0.18 pM | 35        |
| miRNA-21            | Arched probe-mediated isothermal exponential amplification to generate G-quadruplex DNAzyme for electrochemical detection          | 20 fM–<br>50pM    | 5.36 fM | 36        |
| miRNA-21            | T7 Exo-assisted target recycling for electrochemical detection at vertically aligned carbon nanotubes                              | 0.01–<br>100 pM   | 3.5 fM  | This work |

**Table S2** The results of the recovery tests of miRNA-21 in human serum samples (n=3).

| no. | Added concentration<br>(pM) | Found concentration<br>(pM) | Recovery<br>(%) | RSD<br>(%) |
|-----|-----------------------------|-----------------------------|-----------------|------------|
| 1   | 0.05                        | 0.0484                      | 96.8            | 3.0        |
| 2   | 1.0                         | 1.07                        | 107.0           | 5.1        |
| 3   | 10.0                        | 10.23                       | 102.3           | 2.5        |
